# Supplementary material for: Convenient and sensitive colorimetric determination of alendronate sodium with Ce4+-triggered oxidation of TMB
Source: Royal Society of Chemistry journal article supplement (doi:10.1039/d0nj02816a), 2020-01-01
Supplement: d0nj02816a1.pdf [file d0nj02816a1.pdf]

## Convenient and sensitive colorimetric determination of alendronate sodium with $\text{Ce}^{4+}$ -triggered oxidation of TMB

Jing Sun <sup>a</sup>, Rui Wang <sup>b</sup>, Meng Xia <sup>b</sup>, Shuyun Zhu <sup>b\*</sup>, Xian-En Zhao <sup>b\*</sup>

<sup>a</sup> Qinghai Key Laboratory of Qinghai-Tibet Plateau Biological Resources, Northwest Institute of Plateau Biology, Chinese Academy of Sciences, Xining City, Qinghai Province, 810001, Qinghai, China.

<sup>b</sup> College of Chemistry and Chemical Engineering, Qufu Normal University, Qufu City, Shandong Province, 273165, China.

\* Corresponding author: E-mail: shuyunzhu1981@163.com (S. Zhu), xianenzhao@163.com (X. Zhao).

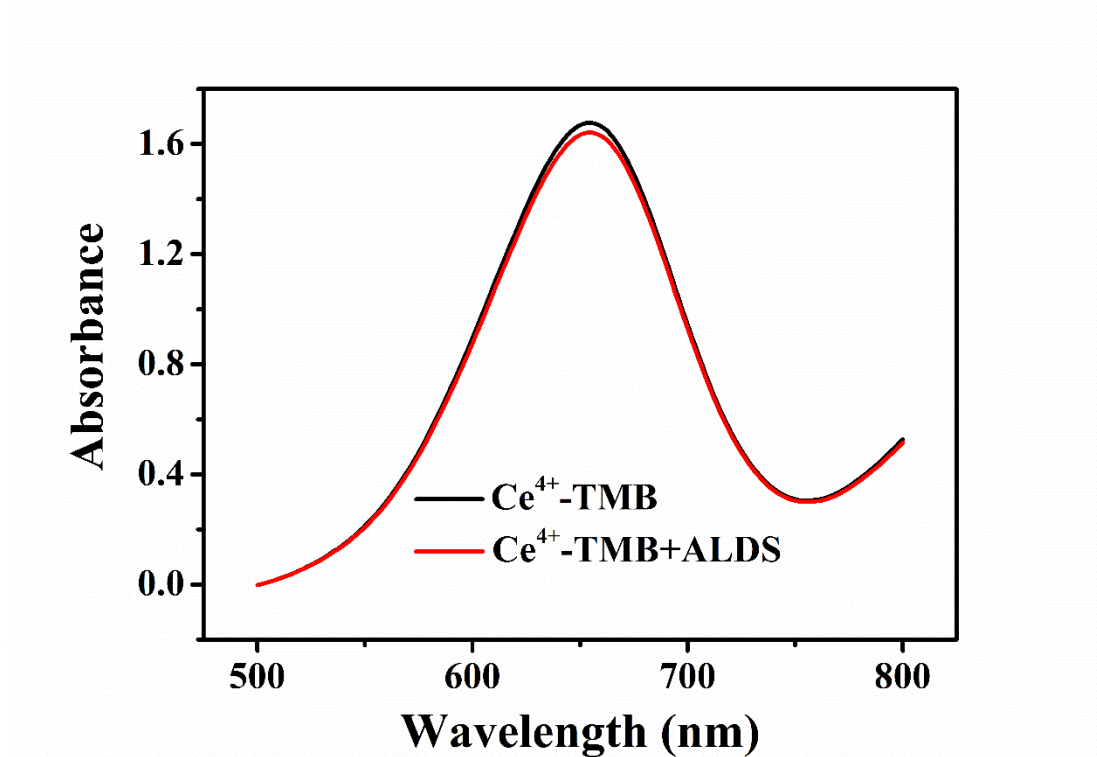

**Fig. S1** The absorption spectra of  $\text{Ce}^{4+}$ -TMB system before and after the addition of ALDS.

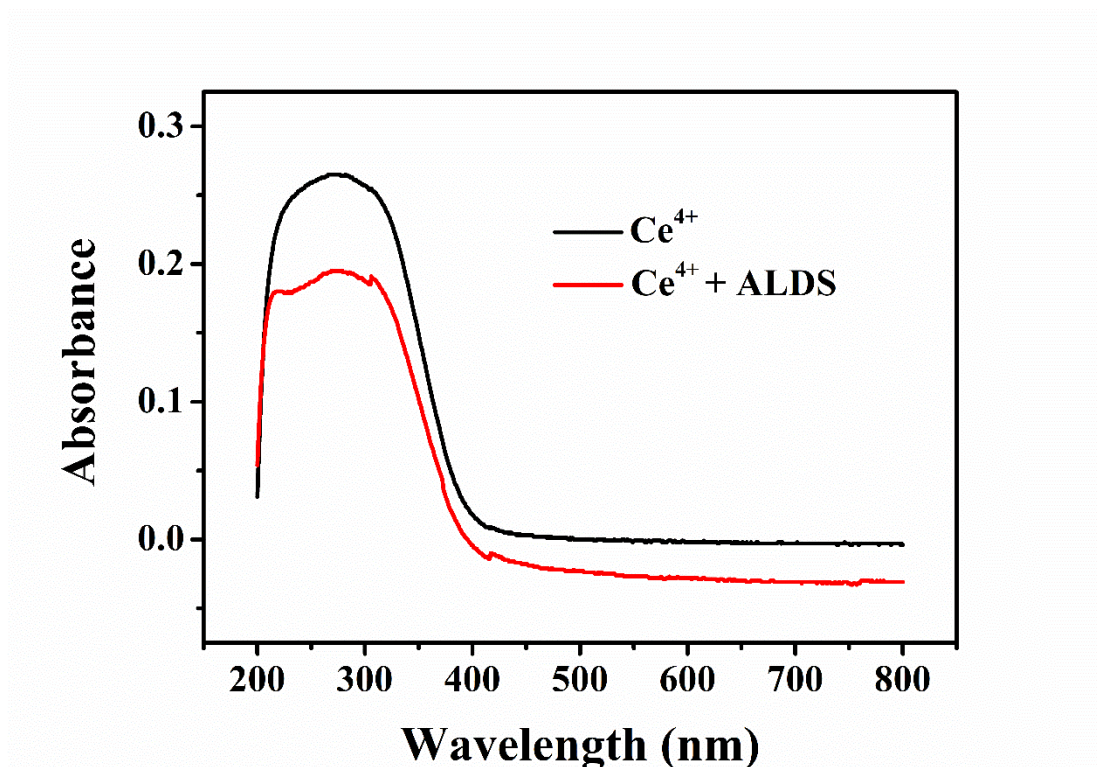

**Fig. S2** The absorption spectra of  $\text{Ce}^{4+}$  in the absence and presence of ALDS.

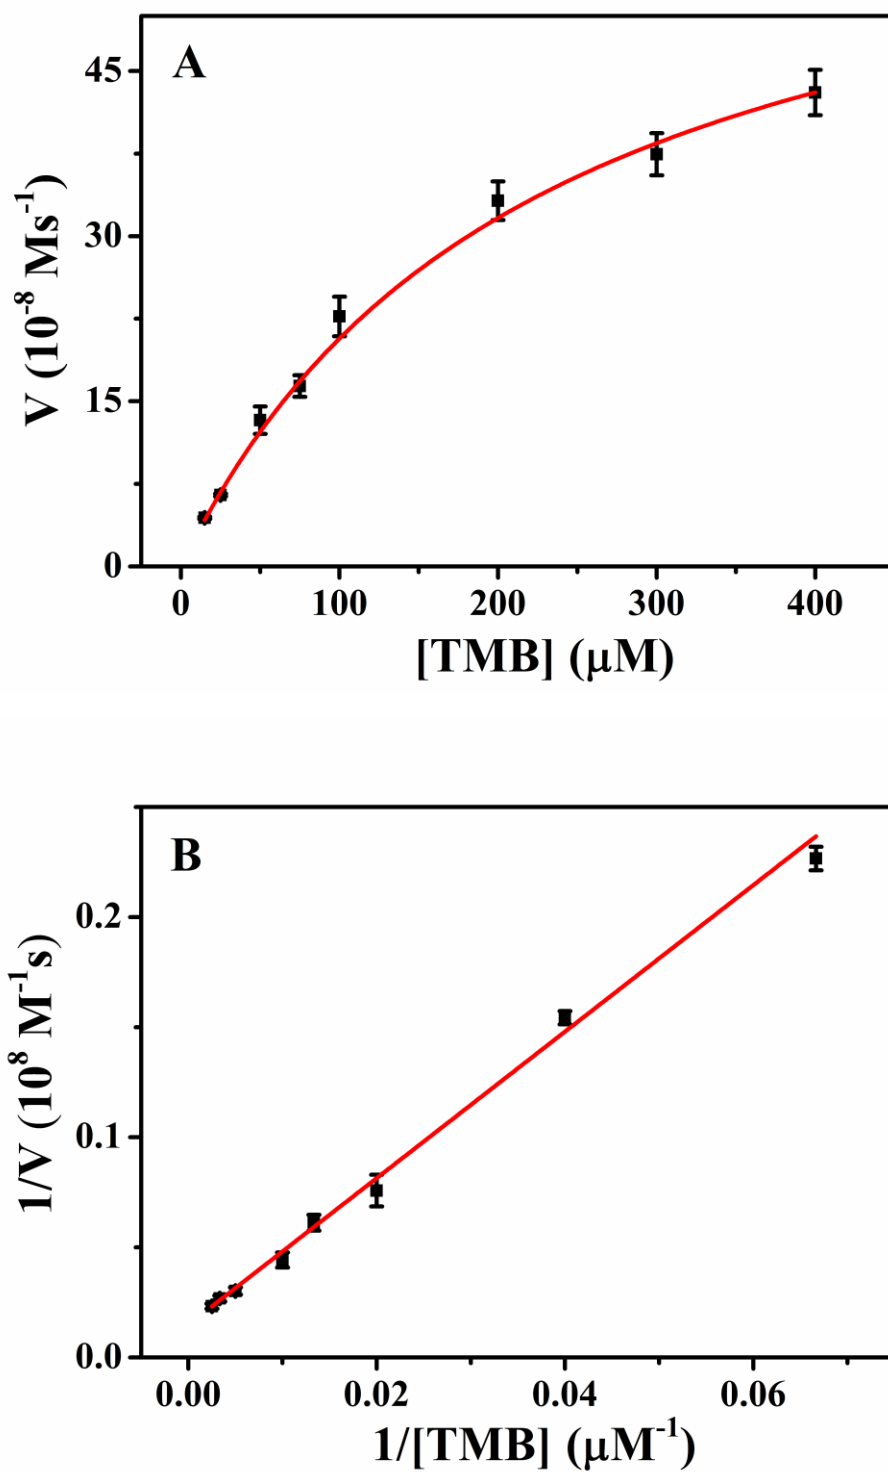

**Fig. S3** (A) Steady-state kinetic assay of  $\text{Ce}^{4+}$  toward TMB and (B) the Lineweaver-Burk plots of the double reciprocal of the Michaelis-Menten equation.

**Table S1** Comparison of apparent kinetic parameters of different oxidase mimics toward TMB.

| Oxidase mimics             | $K_m$ (mM) | $V_{max}$ ( $M s^{-1}$ ) | Refs.     |
|----------------------------|------------|--------------------------|-----------|
| CeO <sub>2</sub>           | 1.5        | 6.9                      | 1         |
| CeO <sub>2</sub> nanocubes | 2.01       | -                        | 2         |
| dextran-coated nanoceria   | 3.8        | 0.7                      | 3         |
| Ce <sup>4+</sup>           | 0.223      | $67.2 \times 10^{-8}$    | This work |

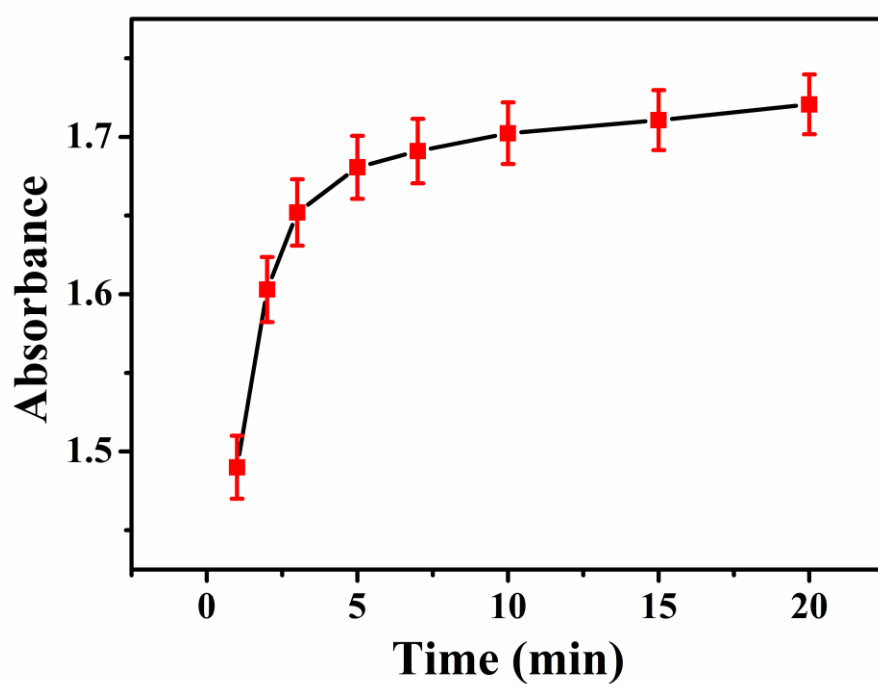

**Fig. S4** Effect of reaction time between Ce<sup>4+</sup> and TMB on the absorbance intensity of Ce<sup>4+</sup>-TMB system.

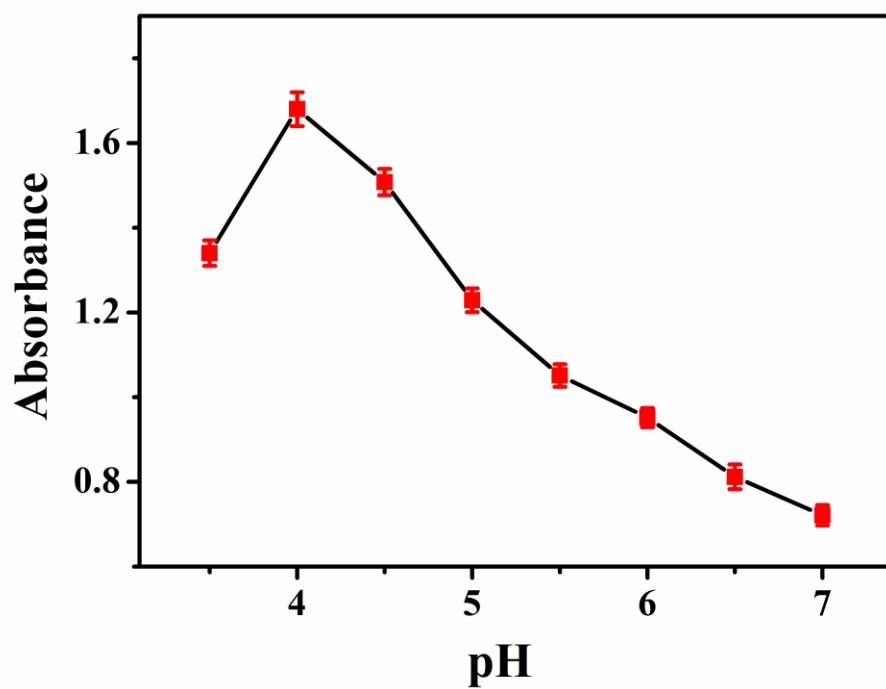

Fig. S5 The effect of pH on the absorbance of Ce<sup>4+</sup>-TMB system.

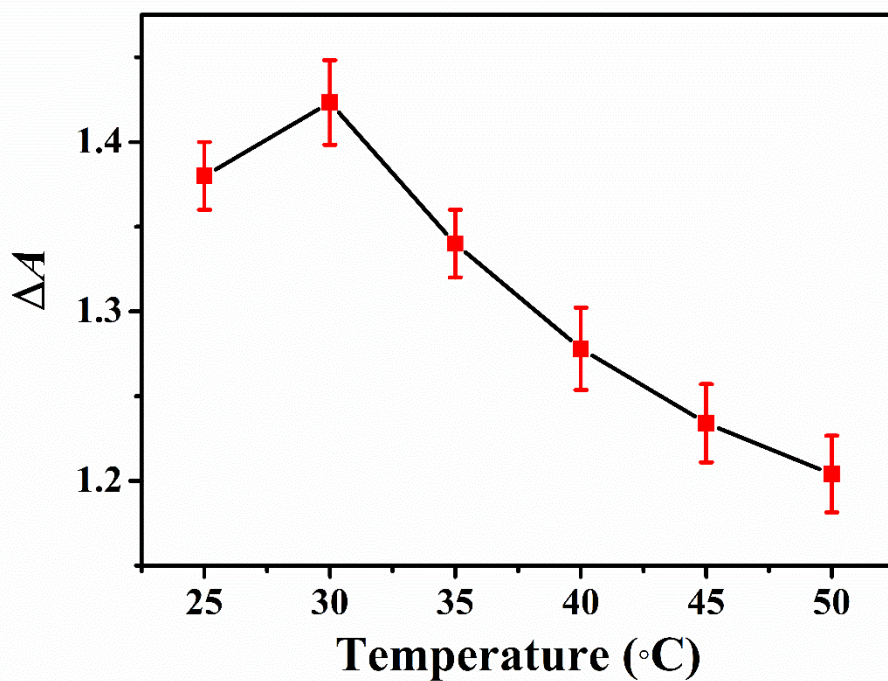

Fig. S6 The effect of temperature on the detection of ALDS.

**Table S2** Results for the detection of ALDS in human uric samples.

| Uric samples | Added ( $\mu\text{M}$ ) | Found ( $\mu\text{M}$ ) | RSD (% , n=3) | Recovery (%) |
|--------------|-------------------------|-------------------------|---------------|--------------|
| 1            | 0                       | ND <sup>a</sup>         | -             | -            |
| 2            | 2.0                     | 1.83                    | 3.88          | 91.5         |
| 3            | 5.0                     | 4.59                    | 3.64          | 91.8         |
| 4            | 25.0                    | 23.95                   | 3.12          | 95.8         |

<sup>a</sup>ND: not detected

**Table S3** Results for the detection of ALDS in tablets.

| Tablets | Tablet detection results ( $\mu\text{M}$ ) | Added ( $\mu\text{M}$ ) | Found ( $\mu\text{M}$ ) | RSD (% , n=3) | Recovery (%) |
|---------|--------------------------------------------|-------------------------|-------------------------|---------------|--------------|
| 1       | 5.8                                        | 2.0                     | 7.92                    | 3.56          | 106.0        |
| 2       | 5.8                                        | 5.0                     | 11.06                   | 3.12          | 105.2        |
| 3       | 5.8                                        | 25.0                    | 30.2                    | 2.15          | 97.6         |

**References:**

- [1] R. Dalapati, B. Sakthivel, M.K. Ghosalya, A. Dhakshinamoorthy and S. Biswas, *Cryst. Eng. Comm.*, 2017, **19**, 5915.
- [2] L. Jiang, S. Fernandez-Garcia, M. Tinoco, Z.X. Yan, Q. Xue, G. Blanco, J.J. Calvino, A.B. Hungria and X.W. Chen, *ACS Appl. Mater. Interfaces*, 2017, **9**, 18595.
- [3] A. Asati, S. Santra, C. Kaittanis, S. Nath and J.M. Perez, *Angew. Chem. Int. Ed.*, 2009, **48**, 2308.
